# Supplementary material
Source: PubMed Central journal article supplement (PMC5348249)
Supplement: NIHMS770957-supplement-Supplement_Table.pdf [file NIHMS770957-supplement-Supplement_Table.pdf]

| Dataset                       | genomic region | PS  | SS     | #days to first sampling | #time points recipient | # sequences recipient | # sequences donor |    |
|-------------------------------|----------------|-----|--------|-------------------------|------------------------|-----------------------|-------------------|----|
| <b>BC</b>                     |                |     |        |                         |                        |                       |                   |    |
| Andreo <i>et al.</i> [1]      | env            | exp | exp    | 183                     | 2                      | 13                    | 16                |    |
| Blanchard <i>et al.</i> [2]   | env            | exp | exp    | 1149                    | 1                      | 2                     | 6                 |    |
|                               | gag            | con | con    | "                       | "                      | 2                     | 5                 |    |
| Cornelissen <i>et al.</i> [3] | env            | con | con    | 21                      | 2                      | 20                    | 8                 |    |
|                               | gag            | exp | exp    | "                       | "                      | 20                    | 9                 |    |
| Diaz-Zhang <i>et al.</i> [4]  | source→recipA  | env | con    | con                     | 791                    | 4                     | 39                | 61 |
|                               | source→recipB  | "   | "      | "                       | 670                    | 5                     | 56                | "  |
| Kao <i>et al.</i> [5]         | env            | log | log    | 316                     | 1                      | 11                    | 31                |    |
| Metzker <i>et al.</i> [6]     | env            | exp | exp    | 420                     | 1                      | 50                    | 50                |    |
| Wolfs <i>et al.</i> [7]       | env            | con | con    | 30                      | 1                      | 8                     | 9                 |    |
|                               | gag            | exp | exp    | "                       | 1                      | 10                    | 8                 |    |
|                               |                |     | mean   | 447,5                   | 2,1                    | 19,3                  | 20,3              |    |
|                               |                |     | median | 368                     | 1,5                    | 12                    | 9                 |    |
| <b>HET</b>                    |                |     |        |                         |                        |                       |                   |    |
| Boeras <i>et al.</i> [8]      |                |     |        |                         |                        |                       |                   |    |
|                               | RW36           | env | exp    | exp                     | 5                      | 1                     | 41                | 59 |
|                               | RW56           | env | exp    | exp                     | 31                     | 1                     | 39                | 58 |
|                               | ZM201          | env | log    | log                     | 14                     | 1                     | 46                | 93 |
|                               | ZM216          | env | log    | log                     | 14                     | 1                     | 59                | 75 |
|                               | ZM221          | env | exp    | log                     | 14                     | 1                     | 72                | 71 |
|                               | ZM238          | env | exp    | exp                     | 47                     | 1                     | 38                | 72 |
|                               | ZM242          | env | exp    | exp                     | 14                     | 1                     | 31                | 44 |
|                               | ZM292          | env | exp    | exp                     | 14                     | 1                     | 39                | 71 |
| Derdeyn <i>et al.</i> [9]     |                |     |        |                         |                        |                       |                   |    |
|                               | 13             | env | con    | con                     | 123                    | 1                     | 16                | 23 |
|                               | 53             | env | exp    | exp                     | 23                     | 1                     | 19                | 34 |
|                               | 55             | env | exp    | exp                     | 14                     | 1                     | 16                | 36 |
|                               | 71             | env | exp    | exp                     | 14                     | 1                     | 11                | 10 |
|                               | 83             | env | log    | log                     | 20                     | 1                     | 11                | 12 |
|                               | 106            | env | con    | con                     | 53                     | 1                     | 13                | 12 |
|                               | 109            | env | exp    | exp                     | 14                     | 1                     | 13                | 13 |
|                               | 135            | env | exp    | exp                     | 26                     | 1                     | 20                | 32 |
| Haaland <i>et al.</i> [10]    |                |     |        |                         |                        |                       |                   |    |
|                               | RW19           | env | exp    | exp                     | 5                      | 1                     | 40                | 40 |
|                               | RW35           | env | log    | log                     | 5                      | 1                     | 40                | 37 |
|                               | RW41           | env | exp    | exp                     | 5                      | 1                     | 40                | 40 |
|                               | RW53           | env | exp    | exp                     | 14                     | 1                     | 42                | 36 |
|                               | RW57           | env | exp    | exp                     | 5                      | 1                     | 42                | 40 |
|                               | RW66           | env | exp    | exp                     | 14                     | 1                     | 41                | 42 |
|                               | ZM190          | env | log    | log                     | 14                     | 1                     | 48                | 35 |
|                               | ZM198          | env | exp    | exp                     | 20                     | 1                     | 41                | 42 |
|                               | ZM205          | env | log    | log                     | 16                     | 1                     | 32                | 45 |
|                               | ZM229          | env | exp    | exp                     | 5                      | 1                     | 27                | 22 |
|                               | ZM243          | env | exp    | exp                     | 14                     | 1                     | 45                | 36 |
|                               | ZM248          | env | log    | log                     | 20                     | 1                     | 57                | 56 |
| Hayman <i>et al.</i> [11]     |                |     |        |                         |                        |                       |                   |    |
|                               | don1→3         | env | con    | con                     | 1462                   | 1                     | 3                 | 10 |
|                               | don1→19        | "   | "      | "                       | 367                    | 1                     | 3                 | "  |
|                               | don1→22        | "   | "      | "                       | 1827                   | 1                     | 6                 | "  |

Continued on next page

**Table 1 – continued  
from previous page**

| Dataset                      | genomic region | PS  | SS     | #days to first sampling | #time points recipient | # sequences recipient | # sequences donor |    |
|------------------------------|----------------|-----|--------|-------------------------|------------------------|-----------------------|-------------------|----|
| Liu <i>et al.</i> [12]       | don17→23       | env | log    | log                     | 913                    | 1                     | 3                 | 6  |
|                              | D              | env | exp    | exp                     | 61                     | 1                     | 11                | 19 |
|                              | E              | env | exp    | exp                     | 61                     | 1                     | 15                | 16 |
|                              | F              | env | exp    | exp                     | 39                     | 1                     | 14                | 15 |
|                              | G              | env | exp    | exp                     | 23                     | 1                     | 13                | 14 |
|                              | I              | env | log    | log                     | 52                     | 1                     | 9                 | 15 |
| Scaduto <i>et al.</i> [13]   | J              | env | exp    | exp                     | 5                      | 1                     | 10                | 13 |
|                              | CC 01→02       | env | exp    | exp                     | 101                    | 1                     | 20                | 20 |
|                              | 01→03          | "   | "      | "                       | 606                    | 1                     | 20                | "  |
|                              | 01→04          | "   | "      | "                       | 777                    | 1                     | 20                | "  |
|                              | 01→05          | "   | "      | "                       | 697                    | 1                     | 20                | "  |
|                              | 01→06          | "   | "      | "                       | 737                    | 1                     | 20                | "  |
|                              | 01→07          | "   | "      | "                       | 471                    | 1                     | 20                | "  |
|                              | CC 01→02       | pol | exp    | exp                     | "                      | "                     | 20                | 20 |
|                              | 01→03          | "   | "      | "                       | "                      | "                     | 20                | "  |
|                              | 01→04          | "   | "      | "                       | "                      | "                     | 20                | "  |
|                              | 01→05          | "   | "      | "                       | "                      | "                     | 20                | "  |
|                              | 01→06          | "   | "      | "                       | "                      | "                     | 20                | "  |
|                              | 01→07          | "   | "      | "                       | "                      | "                     | 20                | "  |
|                              | WA 04→01       | env | exp    | exp                     | 132                    | 1                     | 20                | 20 |
|                              | 04→02          | "   | "      | "                       | 161                    | 1                     | 20                | "  |
|                              | 04→03          | "   | "      | "                       | 511                    | 1                     | 20                | "  |
|                              | 04→05          | "   | "      | "                       | 205                    | 1                     | 19                | "  |
|                              | 04→06          | "   | "      | "                       | 207                    | 1                     | 17                | "  |
|                              | WA 04→01       | pol | exp    | exp                     | "                      | "                     | 20                | 20 |
|                              | 04→02          | "   | "      | "                       | "                      | "                     | 20                | "  |
|                              | 04→03          | "   | "      | "                       | "                      | "                     | 20                | "  |
|                              | 04→05          | "   | "      | "                       | "                      | "                     | 19                | "  |
|                              | 04→06          | "   | "      | "                       | "                      | "                     | 17                | "  |
| Wolfs <i>et al.</i> [7]      | env            | exp | exp    | 5                       | 1                      | 8                     | 8                 |    |
|                              |                |     | mean   | 203,9                   | 1                      | 24,7                  | 33,7              |    |
|                              |                |     | median | 23                      | 1                      | 20                    | 34                |    |
| <b>MSM</b>                   |                |     |        |                         |                        |                       |                   |    |
| Bailey <i>et al.</i> [14]    | gag            | exp | exp    | 9493                    | 4                      | 38                    | 6                 |    |
| Butler <i>et al.</i> [15]    | sourceABC→A    | env | exp    | exp                     | 83                     | 1                     | 10                | 53 |
|                              | sourceABC→B    | "   | "      | "                       | 71                     | 1                     | 8                 | "  |
|                              | sourceABC→C    | "   | "      | "                       | 48                     | 1                     | 5                 | "  |
| Edo-Matas <i>et al.</i> [16] | D              | env | exp    | exp                     | 128                    | 1                     | 13                | 13 |
|                              | E              | env | exp    | exp                     | 73                     | 1                     | 17                | 22 |
|                              | F              | env | exp    | exp                     | 84                     | 1                     | 19                | 44 |
| Edwards <i>et al.</i> [17]   | env            | log | log    | 2994                    | 4                      | 40                    | 23                |    |
| Frost <i>et al.</i> [18]     | 004-007        | env | log    | log                     | 242                    | 4                     | 67                | 33 |
|                              | 206-201        | env | log    | log                     | "                      | 4                     | 64                | 39 |
| 004-007                      | env            | exp | exp    | 10                      | 1                      | 12                    | 12                |    |
| 206-201                      | env            | exp | exp    | 10                      | 1                      | 11                    | 12                |    |

Continued on next page

**Table 1 – continued  
from previous page**

| Dataset                      | genomic region | PS  | SS  | #days to<br>first sam-<br>pling | #time<br>points<br>recipient | # se-<br>quences<br>recipient | # se-<br>quences<br>donor |    |
|------------------------------|----------------|-----|-----|---------------------------------|------------------------------|-------------------------------|---------------------------|----|
|                              | 206-204        | env | exp | exp                             | 10                           | 1                             | 12                        | 13 |
|                              | 512-558        | env | exp | exp                             | 104                          | 1                             | 14                        | 11 |
|                              | 512-559        | env | exp | exp                             | 104                          | 1                             | 11                        | 11 |
|                              | 551-550        | env | exp | exp                             | 10                           | 1                             | 12                        | 13 |
|                              | 564-557        | env | exp | exp                             | 10                           | 1                             | 15                        | 14 |
| Herbeck <i>et al.</i> [19]   |                |     |     |                                 |                              |                               |                           |    |
|                              | 1 gag          | exp | exp | 36                              | 15                           | 304                           | 20                        |    |
|                              | 1 env          | log | log | "                               | 12                           | 418                           | 21                        |    |
|                              | 1 pol          | exp | exp | "                               | 12                           | 152                           | 10                        |    |
|                              | 2 gag          | exp | exp | 13                              | 1                            | 18                            | 10                        |    |
|                              | 2 env          | exp | exp | "                               | "                            | 18                            | 10                        |    |
|                              | 2 pol          | exp | exp | "                               | "                            | 18                            | 10                        |    |
|                              | 3 gag          | exp | exp | 30                              | 1                            | 93                            | 10                        |    |
|                              | 3 env          | exp | exp | "                               | "                            | 93                            | 10                        |    |
|                              | 3 pol          | exp | exp | "                               | "                            | 93                            | 10                        |    |
|                              | 4 gag          | exp | exp | 20                              | 1                            | 30                            | 38                        |    |
|                              | 4 env          | exp | exp | "                               | "                            | 30                            | 38                        |    |
|                              | 4 pol          | exp | exp | "                               | "                            | 30                            | 38                        |    |
| Lawson <i>et al.</i> [20]    | env            | exp | exp | 5                               | 2                            | 19                            | 10                        |    |
| Li <i>et al.</i> [21]        |                |     |     |                                 |                              |                               |                           |    |
|                              | AD18-AD17      | env | exp | exp                             | 10                           | 1                             | 25                        | 17 |
|                              | AD75-AD77      | env | con | con                             | 10                           | 1                             | 27                        | 19 |
|                              | AD83-04013240  | env | exp | exp                             | 10                           | 1                             | 66                        | 22 |
|                              | LAC-HOBR       | env | exp | log                             | 10                           | 1                             | 21                        | 13 |
| Rachinger <i>et al.</i> [22] |                |     |     |                                 |                              |                               |                           |    |
|                              | pat3→1         | env | log | log                             | 153                          | 5                             | 46                        | 65 |
|                              | pat3→2         | "   | "   | "                               | 284                          | 6                             | 61                        | "  |
|                              | pat3→1         | gag | log | log                             | "                            | 5                             | 46                        | 63 |
|                              | pat3→2         | "   | "   | "                               | "                            | 7                             | 46                        | "  |
|                              | pat3→1         | pol | exp | exp                             | "                            | 2                             | 26                        | 24 |
|                              | pat3→2         | "   | "   | "                               | "                            | 3                             | 15                        | "  |
|                              |                |     |     | mean                            | X                            | X                             | X                         | X  |
|                              |                |     |     | median                          | X                            | X                             | X                         | X  |

**Overview of the examined transmission chains.** For each article in which we found useful data, we detail from what genomic region the sequences originate (env = Envelope, gag = Gag polyprotein, pol = Polymerase). We also give the number of sequences by recipient and donor and what demographic model came out best by the path sampling (PS) and stepping stone sampling (SS) marginal likelihood estimators (exp = exponential, con = constant, log = logistic). We also also specify the time between the most recent boundary of the transmission interval and the first sampling of the recipient as well as the number of available time points for the recipient. When multiple transmission chains were available, we kept the original naming and specify all details for each chain separately. Similarly, when a chain comprises multiple transmission events, the data are specified per event.

## References

- [1] Andreo, S.M.S., Barra, L.A.C., Costa, L.J., Sucupira, M.C.A., Souza, I.E.L., Diaz, R.S.: Hiv type 1 transmission by human bite. *AIDS Res Hum Retroviruses* **20**(4), 349–50 (2004)

- [2] Blanchard, A., Ferris, S., Chamaret, S., Guétard, D., Montagnier, L.: Molecular evidence for nosocomial transmission of human immunodeficiency virus from a surgeon to one of his patients. *J Virol* **72**(5), 4537–40 (1998)
- [3] Cornelissen, M., Mulder-Kampinga, G., Veenstra, J., Zorgdrager, F., Kuiken, C., Hartman, S., Dekker, J., van der Hoek, L., Sol, C., Coutinho, R.: Syncytium-inducing (si) phenotype suppression at seroconversion after intramuscular inoculation of a non-syncytium-inducing/si phenotypically mixed human immunodeficiency virus population. *J Virol* **69**(3), 1810–8 (1995)
- [4] Diaz, R.S., Zhang, L., Busch, M.P., Mosley, J.W., Mayer, A.: Divergence of hiv-1 quasiespecies in an epidemiologic cluster. *AIDS* **11**(4), 415–22 (1997)
- [5] Kao, C.-F., Hsia, K.-T., Chang, S.-Y., Chang, F.-Y., Nelson, K., Yang, C.-H., Huang, Y.-F., Fu, T.-Y., Yang, J.-Y.: An uncommon case of hiv-1 transmission due to a knife fight. *AIDS Res Hum Retroviruses* **27**(2), 115–22 (2011)
- [6] Metzker, M.L., Mindell, D.P., Liu, X.-M., Ptak, R.G., Gibbs, R.A., Hillis, D.M.: Molecular evidence of hiv-1 transmission in a criminal case. *Proc Natl Acad Sci U S A* **99**(22), 14292–7 (2002)
- [7] Wolfs, T.F., Zwart, G., Bakker, M., Goudsmit, J.: Hiv-1 genomic rna diversification following sexual and parenteral virus transmission. *Virology* **189**(1), 103–10 (1992)
- [8] Boeras, D.I., Hraber, P.T., Hurlston, M., Evans-Strickfaden, T., Bhattacharya, T., Giorgi, E.E., Mulenga, J., Karita, E., Korber, B.T., Allen, S., Hart, C.E., Derdeyn, C.A., Hunter, E.: Role of donor genital tract hiv-1 diversity in the transmission bottleneck. *Proc Natl Acad Sci U S A* **108**(46), 1156–63 (2011)
- [9] Derdeyn, C.A., Decker, J.M., Bibollet-Ruche, F., Mokili, J.L., Muldoon, M., Denham, S.A., Heil, M.L., Kasolo, F., Musonda, R., Hahn, B.H., Shaw, G.M., Korber, B.T., Allen, S., Hunter, E.: Envelope-constrained neutralization-sensitive hiv-1 after heterosexual transmission. *Science* **303**(5666), 2019–22 (2004)
- [10] Haaland, R.E., Hawkins, P.A., Salazar-Gonzalez, J., Johnson, A., Tichacek, A., Karita, E., Manigart, O., Mulenga, J., Keele, B.F., Shaw, G.M., Hahn, B.H., Allen, S.A., Derdeyn, C.A., Hunter, E.: Inflammatory genital infections mitigate a severe genetic bottleneck in heterosexual transmission of subtype a and c hiv-1. *PLoS Pathog* **5**(1), 1000274 (2009)
- [11] Hayman, A., Moss, T., Simmons, G., Arnold, C., Holmes, E.C., Naylor-Adamson, L., Hawkswell, J., Allen, K., Radford, J., Nguyen-Van-Tam, J., Balfe, P.: Phylogenetic analysis of multiple heterosexual transmission events involving subtype b of hiv type 1. *AIDS Res Hum Retroviruses* **17**(8), 689–95 (2001)
- [12] Liu, Y., Curlin, M.E., Diem, K., Zhao, H., Ghosh, A.K., Zhu, H., Woodward, A.S., Maenza, J., Stevens, C.E., Stekler, J., Collier, A.C., Genowati, I., Deng, W., Zioni, R., Corey, L., Zhu, T., Mullins, J.I.: Env length and n-linked glycosylation following transmission of human immunodeficiency virus type 1 subtype b viruses. *Virology* **374**(2), 229–33 (2008)
- [13] Scaduto, D.I., Brown, J.M., Haaland, W.C., Zwickl, D.J., Hillis, D.M., Metzker, M.L.: Source identification in two criminal cases using phylogenetic analysis of hiv-1 dna sequences. *Proc Natl Acad Sci U S A* **107**(50), 21242–7 (2010)
- [14] Bailey, J.R., O’Connell, K., Yang, H.-C., Han, Y., Xu, J., Jilek, B., Williams, T.M., Ray, S.C., Siliciano, R.F., Blankson, J.N.: Transmission of human immunodeficiency virus type 1 from a patient who developed aids to an elite suppressor. *J Virol* **82**(15), 7395–410 (2008)
- [15] Butler, D.M., Delport, W., Kosakovsky Pond, S.L., Lakdawala, M.K., Cheng, P.M., Little, S.J., Richman, D.D., Smith, D.M.: The origins of sexually transmitted hiv among men who have sex with men. *Sci Transl Med* **2**(18), 18–1 (2010)

- [16] Edo-Matas, D., Rachinger, A., Setiawan, L.C., Boeser-Nunnink, B.D., van 't Wout, A.B., Lemey, P., Schuitemaker, H.: The evolution of human immunodeficiency virus type-1 (hiv-1) envelope molecular properties and coreceptor use at all stages of infection in an hiv-1 donor-recipient pair. *Virology* **422**(1), 70–80 (2012)
- [17] Edwards, C.T.T., Holmes, E.C., Wilson, D.J., Viscidi, R.P., Abrams, E.J., Phillips, R.E., Drummond, A.J.: Population genetic estimation of the loss of genetic diversity during horizontal transmission of hiv-1. *BMC Evol Biol* **6**, 28 (2006)
- [18] Frost, S.D.W., Liu, Y., Pond, S.L.K., Chappey, C., Wrin, T., Petropoulos, C.J., Little, S.J., Richman, D.D.: Characterization of human immunodeficiency virus type 1 (hiv-1) envelope variation and neutralizing antibody responses during transmission of hiv-1 subtype b. *J Virol* **79**(10), 6523–7 (2005)
- [19] Herbeck, J.T., Rolland, M., Liu, Y., McLaughlin, S., McNevin, J., Zhao, H., Wong, K., Stoddard, J.N., Raugi, D., Sorensen, S., Genowati, I., Birditt, B., McKay, A., Diem, K., Maust, B.S., Deng, W., Collier, A.C., Stekler, J.D., McElrath, M.J., Mullins, J.I.: Demographic processes affect hiv-1 evolution in primary infection before the onset of selective processes. *J Virol* **85**(15), 7523–34 (2011)
- [20] Lawson, V.A., Oelrichs, R., Guillon, C., Imrie, A.A., Cooper, D.A., Deacon, N.J., McPhee, D.A.: Adaptive changes after human immunodeficiency virus type 1 transmission. *AIDS Res Hum Retroviruses* **18**(8), 545–56 (2002)
- [21] Li, H., Bar, K.J., Wang, S., Decker, J.M., Chen, Y., Sun, C., Salazar-Gonzalez, J.F., Salazar, M.G., Learn, G.H., Morgan, C.J., Schumacher, J.E., Hraber, P., Giorgi, E.E., Bhattacharya, T., Korber, B.T., Perelson, A.S., Eron, J.J., Cohen, M.S., Hicks, C.B., Haynes, B.F., Markowitz, M., Keele, B.F., Hahn, B.H., Shaw, G.M.: High multiplicity infection by hiv-1 in men who have sex with men. *PLoS Pathog* **6**(5), 1000890 (2010)
- [22] Rachinger, A., Groeneveld, P.H.P., van Assen, S., Lemey, P., Schuitemaker, H.: Time-measured phylogenies of gag, pol and env sequence data reveal the direction and time interval of hiv-1 transmission. *AIDS* **25**(8), 1035–9 (2011)

Table 1: Overview of the dataset composition.

| <i>risk group</i> | # transmission chains | <i>gag</i> | <i>pol</i> | <i>env</i> |
|-------------------|-----------------------|------------|------------|------------|
| BC                | 7 (8)                 | 3          | -          | 7          |
| HET               | 39 (50)               | -          | 2          | 39         |
| MSM               | 24 (26)               | 7          | 5          | 23         |
| <i>total</i>      | 70 (84)               | 10         | 7          | 69         |

The number of analyzed transmission chains is given, with the total number of transmission events between brackets. The majority of the chains (60/70, 85.7%) represent 1 transmission event (range: 1 to 6). Sometimes, data of multiple genomic regions were available, augmenting the total number of datasets to  $n = 86$ . The number of chains is also given for each genomic region. Most data are available of the *env* region.

Table 2: Results of the fixed effects analyses.

|                            | bottleneck size difference | $\delta$ | conditional effect size <sup>3</sup> | average bottleneck size (%) <sup>4</sup> |
|----------------------------|----------------------------|----------|--------------------------------------|------------------------------------------|
| as model test <sup>1</sup> | no                         | 3.4E-2   | -0.48 (-3.15, 1.43)                  | 96.5 (99.42)                             |
| all logistic <sup>2</sup>  | no                         | 1.6E-1   | -3.15 (-15.92, 6.53)                 | 96.2 (98.69)                             |

<sup>1</sup> The demographic model of each dataset was specified according to the model selected by the PS and SS marginal likelihood estimators.

<sup>2</sup> In this analysis, all transmission chains were parametrized using the logistic growth model.

<sup>3</sup> This is the mean effect size and HPD interval (in ln units) of the predictor conditioned on inclusion of the effect in the model (i.e.,  $\beta_i|\delta_i = 1$ ).

<sup>4</sup> The average percentage of genetic diversity lost at transmission calculated using all datasets. The value between brackets was obtained after excluding the dataset with the smallest transmission bottleneck.

Table 3: Risk group evolutionary rate dataset characteristics.

| subtype  | risk group (# taxa) | date range | % male            |
|----------|---------------------|------------|-------------------|
| A1       | HET (44)            | 1986-2008  | 29.5              |
|          | IDU (23)            | 1997-2007  | 55.5              |
| B        | HET (54)            | 1996-2009  | 44.4              |
|          | MSM (73)            | 1983-2012  | 100               |
| CRF01_AE | HET (77)            | 1990-2009  | 48.7 <sup>1</sup> |
|          | MSM (57)            | 2007-2011  | 100               |

<sup>1</sup> In these datasets there were a number of taxa with unknown gender origins. The reported male proportion does not take these into account.
