# Supplementary material
Source: PubMed Central journal article supplement (PMC5348249)
Supplement: NIHMS770957-supplement-Supplemental_Figure_2.pdf [file NIHMS770957-supplement-Supplemental_Figure_2.pdf]

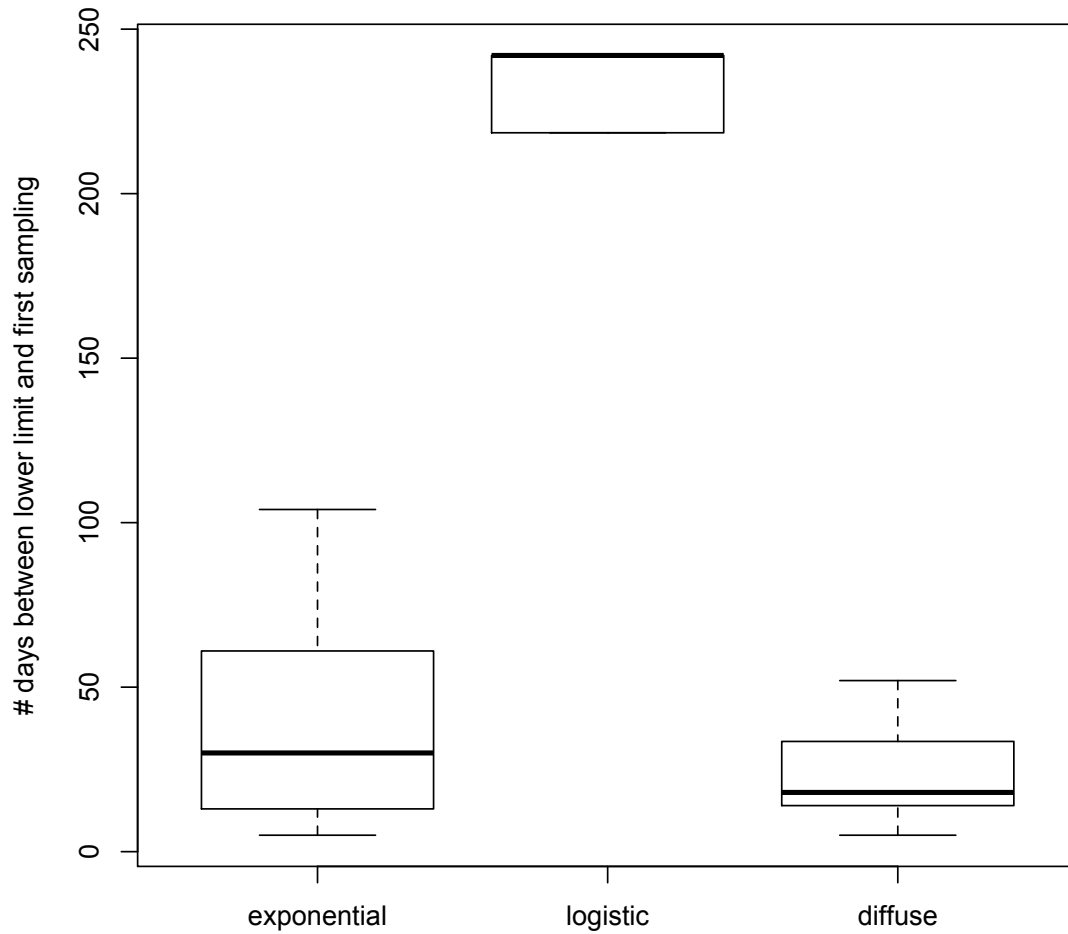

Figure 2: **Boxplot representation of the number of days between infection and first sampling.** Exponential, logistic and diffuse refer to the category a dataset belongs to based on the logBF support for the exponential or logistic model. If the log BF in support for either model is  $<5$ , the transmission chain is labeled diffuse.
