# Supplementary material
Source: PubMed Central journal article supplement (PMC5348249)
Supplement: NIHMS770957-supplement-Supplemental_Figure_3.pdf [file NIHMS770957-supplement-Supplemental_Figure_3.pdf]

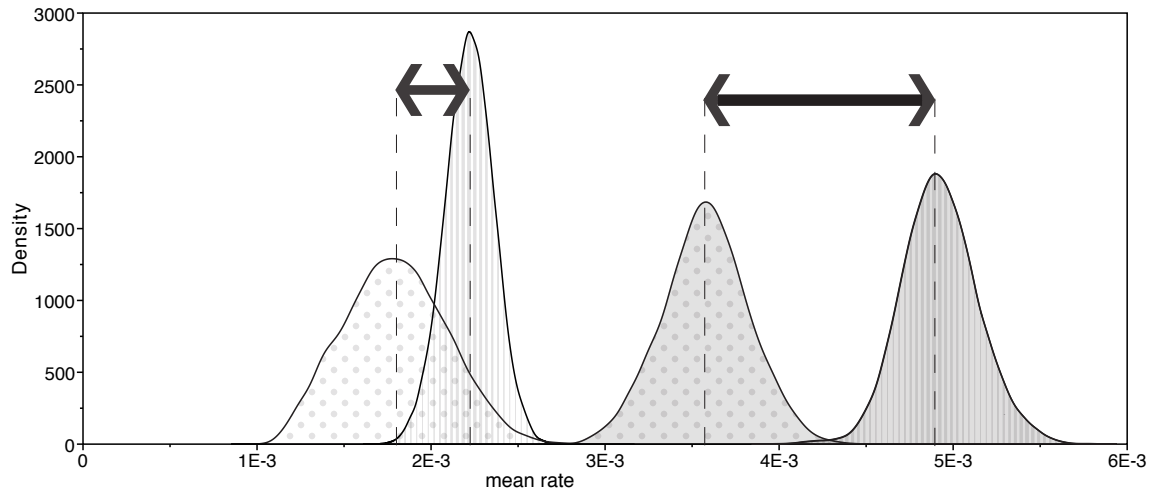

Figure 3: **Effect of gender bias on the evolutionary rate in *pol* and *env* for subtype B.** Shown are the marginal posterior probability distributions of the mean rate statistic for the *pol* (white background) and *env* (grey background) regions of subtype B. Estimates for the HET risk group are dotted, the estimates for the MSM risk group are striped. The two-sided arrow points at the difference between the means of the estimate of both risk groups for the same genomic region.
